# Supplementary material
Source: publisher figshare collection journal article supplement (https://sage.figshare.com/ndownloader/files/18209264)
Supplement: Supplementary file 1 [file 18209264]

*Descriptive data for each variable analysed in the renounced and non renounced groups. Frequencies and percentages for categorical variables; means and standard deviations for quantitative variables.*

| Sociodemographic Variables             |  | Renounced |                 | Not renounced    |                 |                  |
|----------------------------------------|--|-----------|-----------------|------------------|-----------------|------------------|
|                                        |  | <i>n</i>  | %               | <i>n</i>         | %               |                  |
| Educational level                      |  | 85        |                 | 308              |                 |                  |
| Without studies                        |  |           | 11.8            |                  | 18.5            |                  |
| Mandatory studies/vocational training  |  |           | 71.8            |                  | 67.2            |                  |
| Baccalaureate or university studies    |  |           | 16.5            |                  | 14.3            |                  |
| Country of origin                      |  | 85        |                 | 308              |                 |                  |
| Spain                                  |  |           | 85.9            |                  | 85.1            |                  |
| Latin America                          |  |           | 8.2             |                  | 8.8             |                  |
| Other                                  |  |           | 5.9             |                  | 6.2             |                  |
| Residence                              |  | 85        |                 | 306              |                 |                  |
| Rural                                  |  |           | 10.6            |                  | 28.1            |                  |
| Urban                                  |  |           | 89.4            |                  | 71.9            |                  |
|                                        |  | <b>n</b>  | <b><i>M</i></b> | <b><i>SD</i></b> | <b><i>M</i></b> | <b><i>SD</i></b> |
| Number of children                     |  | 388       | 1.23            | .95              | 1.47            | 1.16             |
| Age                                    |  | 388       | 32.93           | 10.51            | 34.58           | 11.02            |
| Monthly income (€)                     |  | 381       | 413.99          | 415.35           | 385.46          | 457.85           |
| Psychological Variables                |  | Renounced |                 | Not renounced    |                 |                  |
|                                        |  | <i>n</i>  | %               | <i>n</i>         | %               |                  |
| Psychological support received         |  | 85        |                 | 299              |                 |                  |
| Without support                        |  |           | 72.9            |                  | 75.9            |                  |
| Social Services Support                |  |           | 11.8            |                  | 17.1            |                  |
| Public Health Services                 |  |           | 15.3            |                  | 7               |                  |
|                                        |  | <b>n</b>  | <b><i>M</i></b> | <b><i>SD</i></b> | <b><i>M</i></b> | <b><i>SD</i></b> |
| Days of psychological support received |  | 100       | 919.42          | 1821.14          | 422.04          | 999.68           |
| Support from family/friends (0 – 10)   |  | 386       | 7.90            | 2.56             | 7.70            | 3.09             |

*It continues on the next page...*

| Emotional variables               |  | Renounced |          | Not renounced |          |           |
|-----------------------------------|--|-----------|----------|---------------|----------|-----------|
|                                   |  | <i>n</i>  | %        | <i>n</i>      | %        |           |
| Contact with the aggressor        |  | 85        |          | 139           |          |           |
| No contact                        |  |           | 33.3     |               | 76.3     |           |
| Occasional                        |  |           | 47.6     |               | 16.5     |           |
| Frequent                          |  |           | 19       |               | 7.2      |           |
| Thought of going back with him    |  | 85        |          | 304           |          |           |
| Yes                               |  |           | 9.5      |               | 5.6      |           |
| No                                |  |           | 90.5     |               | 94.4     |           |
| Not sure                          |  |           | 0        |               | 0        |           |
|                                   |  | <i>n</i>  | <i>M</i> | <i>SD</i>     | <i>M</i> | <i>SD</i> |
| Fear towards her (0 – 10)         |  | 387       | 7.35     | 2.86          | 7.56     | 2.97      |
| Fear towards children (0 – 10)    |  | 337       | 4.41     | 4.11          | 4.57     | 4.32      |
| Feeling of being in risk (0 – 10) |  | 381       | 5.75     | 3.45          | 6.52     | 3.12      |
| Concern about prison (0 - 10      |  | 128       | 4.57     | 4.70          | 6.36     | 3.73      |
| Concern about money/work (0 – 10) |  | 387       | 7.28     | 3.32          | 7.25     | 3.46      |
| Guilt (0 – 10)                    |  | 386       | 3.22     | 3.72          | 3.56     | 3.73      |
| Motivational variables            |  | Renounced |          | Not renounced |          |           |
|                                   |  | <i>n</i>  | %        | <i>n</i>      | %        |           |
| Manage to incarcerate him         |  | 83        |          | 304           |          |           |
| Yes                               |  |           | 1.2      |               | 3.6      |           |
| No                                |  |           | 98.1     |               | 96.4     |           |
| Stop abusing her                  |  | 83        |          | 304           |          |           |
| Yes                               |  |           | 19.3     |               | 88.8     |           |
| No                                |  |           | 80.7     |               | 11.2     |           |
| Separate from him                 |  | 83        |          | 304           |          |           |
| Yes                               |  |           | 31.3     |               | 45.4     |           |
| No                                |  |           | 68.7     |               | 54.6     |           |
| Get protection                    |  | 83        |          | 304           |          |           |
| Yes                               |  |           | 72.3     |               | 79.9     |           |
| No                                |  |           | 27.7     |               | 20.1     |           |
| Give him a scarce                 |  | 83        |          | 304           |          |           |
| Yes                               |  |           | 10.8     |               | 7.9      |           |
| No                                |  |           | 89.2     |               | 92.1     |           |
